# Supplementary material for: Skin autofluorescence profile in Tunisian hemodialysis patients with and without heart failure
Source: Research Square preprint supplement (doi:10.21203/rs.3.rs-900707/v1), 2021-09-17
Supplement: Supplementary file 2 [file 31e9745c526cd04762c6e219.docx]

**Table 1. Demographic and clinical data of hemodialysis patients**

Hemodialysis patients (n = 60)

Age (years) 47.57 ± 15.54

Male 36 (60 %)

BMI (kg/m2) 24.22 ± 5.23

Dialyse duration, (months) 47 (21-96)

Kt/V 1.64 ± 0.32

URR (%) 67.76 ± 7.48

Main reasons for dialysis

Primary glomerular Disorders 14 (23.3%)

Diabetes nephropathy 13 (21.6%)

Renovascular/Hypertensive nephropathy 13 (21.6%)

Interstitial nephropathy 12 (20%)

Ploycystic nephropathy 3 (5%)

Unknown 5 (8.3%)

Diabetes mellitus 13 (21%)

Hypertension 42 (70 %)

Dyslipidemia 23 (38 %)

Hemoglobin, g/L 9.04 ± 1.70

Albumin, g/L 42.58 ± 3.19

Fasting glucose, mmol/L 5.50 (4.60-6.82)

Triglyceride, mmol/L 1.50 (1.03-2.39)

Total cholesterol, mmol/L 3.85 ± 0.92

Skin Autofluorescence, AU 2.90 (2.40-3.60)

Data are shown as the mean ± SD, median (interquartile range), or number (percentage).

BMI: body mass index

**Table 2. SAF levels in HD patients with diabetes mellitus, hypertension and dyslipidemia**

HD patients SAF (AU) *P*

Diabetes mellitus (+), (n = 13) 3.20 (2.90-3.95) 0.021

Diabetes mellitus (-), (n = 47) 2.70 (2.30-3.30)

Hypertension (+), (n = 42) 2.95 (2.50-3.65) 0.297

Hypertension (-), (n = 18) 2.60 (2.27-3.60)

Dyslipidemia (+), (n = 23) 3.20 (2.70- 3.80) 0.097

Dyslipidemia (-), (n = 37) 2.70 (2.40-3.20)

Data are shown as the median (interquartile range).

(+): With; (-): Without.

**Table 3. SAF levels in HD patients with and without heart failure**

Hemodialysis patients (n = 60)

H F (-) (n = 42) HF (+) (n = 18) *P*

Age (years) 46.20 ± 15.26 48.44 ± 15.87 NS

Male, n (%) 27 (64 %) 9 (50%) NS

BMI (kg/m2) 23.69 ± 4.84 24.97 ± 6.17 NS

Dialysis duration, (months) 46 (19-81) 66 (37-127) 0.045

Kt/V 1.63 ± 0.31 1.66 ± 0.32 NS

URR (%) 66.88 ± 7.58 69.72 ± 7.06 NS

Hemoglobin, g/L 8.80 ± 1.69 9.61 ± 1.62 NS

Albumin, g/L 42.47 ± 3.36 42.84 ± 2.82 NS

Fasting glucose, mmol/L 5.50 (4.60-6.70) 5.60 (4.65-9.35) NS

Triglyceride, mmol/L 1.48 (1.00-2.17) 1.55 (1.10-2.73) NS

Total cholesterol, mmol/L 3.69 ± 0.88 4.11 ± 0.81 0.039

Skin Autofluorescence, AU 2.60 (2.30-3.20) 3.65 (2.90-4.12) <0.001

Data are shown as the mean ± SD, median (interquartile range), or number (percentage).

HF: heart failure

BMI: body mass index
